# Supplementary material for: Maternal Broadly Neutralizing Antibodies Can Select for Neutralization-Resistant, Infant-Transmitted/Founder HIV Variants
Source: mBio. 2020 Mar 10;11(2):e00176-20. doi: 10.1128/mBio.00176-20 (PMC7064758; doi:10.1128/mBio.00176-20)
Supplement: FIG S4 [file mBio.00176-20-sf004.pdf]

Closest to infant T/F virus Phylogenetic distance → Most distant to infant T/F virus

[illegible]

| ID <sub>50</sub> | IC <sub>50</sub> (µg/ml) | NT: not tested |
|------------------|--------------------------|----------------|
| <20              | >50                      |                |
| <100             | 21-49.9                  |                |
| >100             | 5-20.9                   |                |

[illegible][illegible][illegible]
