# Supplementary material for: Maternal Broadly Neutralizing Antibodies Can Select for Neutralization-Resistant, Infant-Transmitted/Founder HIV Variants
Source: PubMed Central journal article supplement (PMC7064758; doi:10.1128/mbio.00176-20), 2020-03-10

**A** U.S. non-transmitter  
193.1

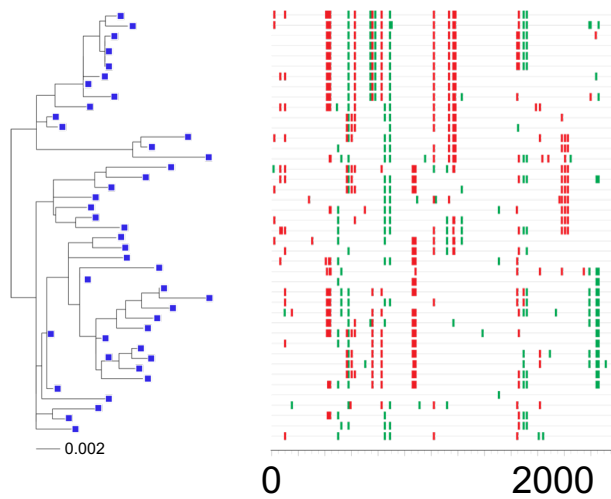

**B** Malawian non-transmitter  
5807

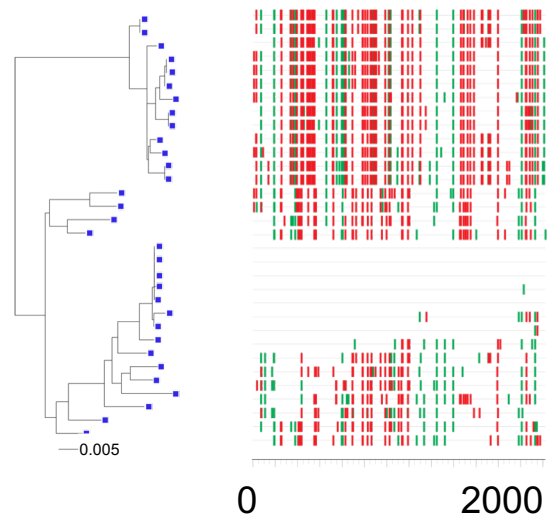

**C** Malawian non-transmitter  
0301

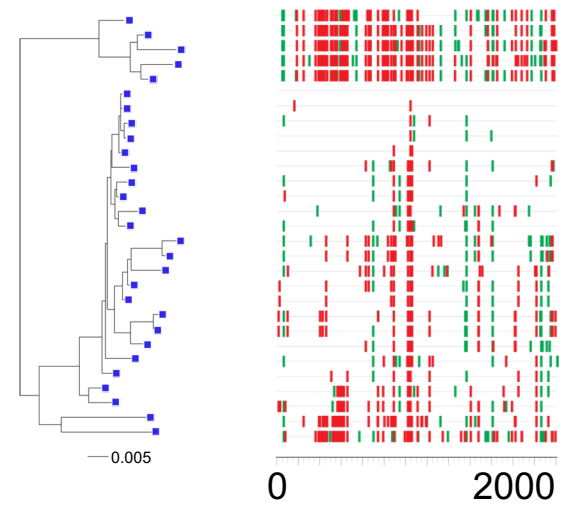

Supplement: mBio.00176-20-sf002.pdf [file mBio.00176-20-sf002.pdf]
