# Supplementary material for: Maternal Broadly Neutralizing Antibodies Can Select for Neutralization-Resistant, Infant-Transmitted/Founder HIV Variants
Source: PubMed Central journal article supplement (PMC7064758; doi:10.1128/mbio.00176-20), 2020-03-10

**A**

|                      |                                |
|----------------------|--------------------------------|
| V3                   | NNTRKSIHIGPGRAFYATGDIIGDIRQAHC |
| V3 K305Q/I307T/H308T | NNTRQSTTIGPGRAFYATGDIIGDIRQAHC |
| V3 F317L/A319T/D322R | NNTRKSIHIGPGRALYTT-RIIGDIRQAHC |
| V3 F317A/A319K/D322A | NNTRKSIHIGPGRAYKTGAIIGDIRQAHC  |
| V3 K305A             | NNTRASIHIGPGRAFYATGDIIGDIRQAHC |
| V3 I307A             | NNTRKSAHIGPGRAFYATGDIIGDIRQAHC |
| V3 H308A             | NNTRKSAIIGPGRAFYATGDIIGDIRQAHC |
| V3 F317A             | NNTRKSIHIGPGRAYATGDIIGDIRQAHC  |
| V3 A319K             | NNTRKSIHIGPGRIFYKTGDIIGDIRQAHC |
| V3 D322A             | NNTRKSIHIGPGRAFYATGAIIGDIRQAHC |

**B****H650367**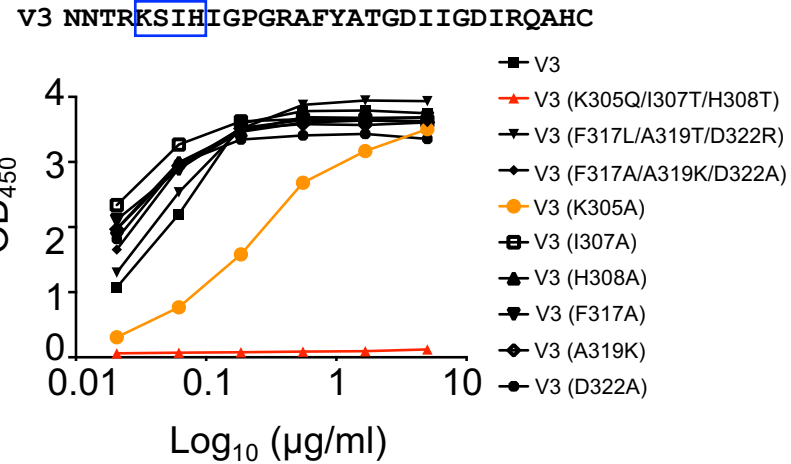**C****H650099**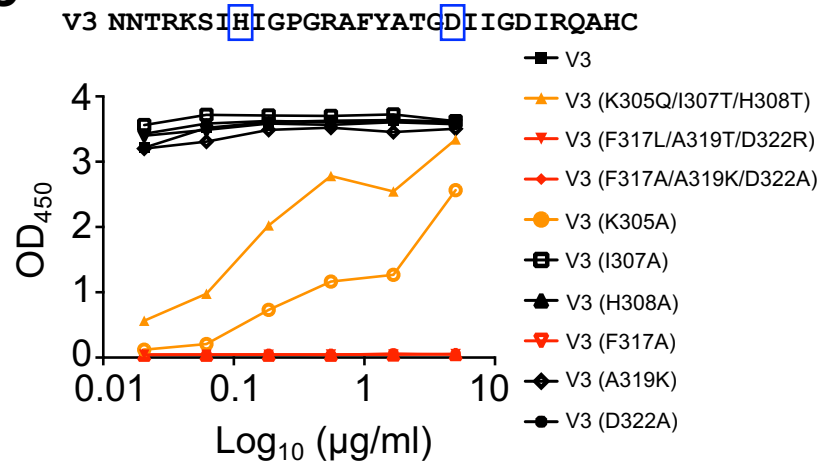**D****H650129**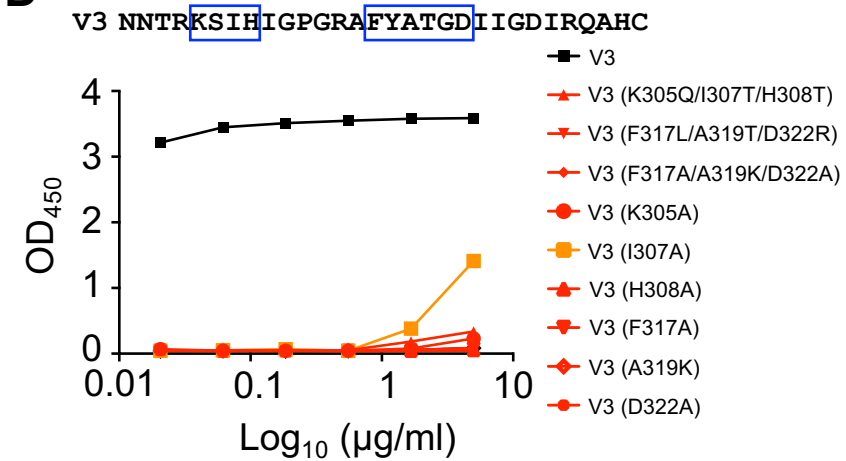

Supplement: mBio.00176-20-sf005.pdf [file mBio.00176-20-sf005.pdf]
