# Supplementary material for: Maternal Broadly Neutralizing Antibodies Can Select for Neutralization-Resistant, Infant-Transmitted/Founder HIV Variants
Source: PubMed Central journal article supplement (PMC7064758; doi:10.1128/mbio.00176-20), 2020-03-10
Supplement: mBio.00176-20-sf006.pdf [file mBio.00176-20-sf006.pdf]

**A**

| PTID/mAb      | Ce1176 | Ce1176 N276Q | Ce1176 N88A | Ce1176 N625A | Ce1176 N332A |
|---------------|--------|--------------|-------------|--------------|--------------|
| <b>3902</b>   | 1122   | 726          | 846         | 969          | 1030         |
| <b>PGT128</b> | <0.02  | <0.02        | NT          | NT           | 24.5         |
| <b>VRC01</b>  | 3.93   | 1.49         | 4.04        | 4.73         | 5.12         |
| <b>35022</b>  | 0.03   | 0.02         | >50         | >50          | NT           |

↑  
wild  
type

↑  
CD4bs  
mutant

┌──────────┐  
gp120/gp41  
interface  
mutants

↑  
V3  
glycan  
mutant

| ID <sub>50</sub> | IC <sub>50</sub> (μg/ml) | NT: not tested |
|------------------|--------------------------|----------------|
| <20              | >50                      |                |
| 21-100           | 21-49.9                  |                |
| 101-200          | 5-20.9                   |                |
| 201-500          | 1.1-4.99                 |                |
| >501             | <0.02-1                  |                |
